# Supplementary material for: Endothelial cell specification in the somite is compromised in Pax3-positive progenitors of Foxc1/2 conditional mutants, with loss of forelimb myogenesis
Source: Oxford University Press journal article supplement (doi:10.1242/dev.128017), 2016-01-01
Supplement: dev128017supp.pdf [file dev128017supp.pdf]

## SUPPLEMENTARY FIGURES

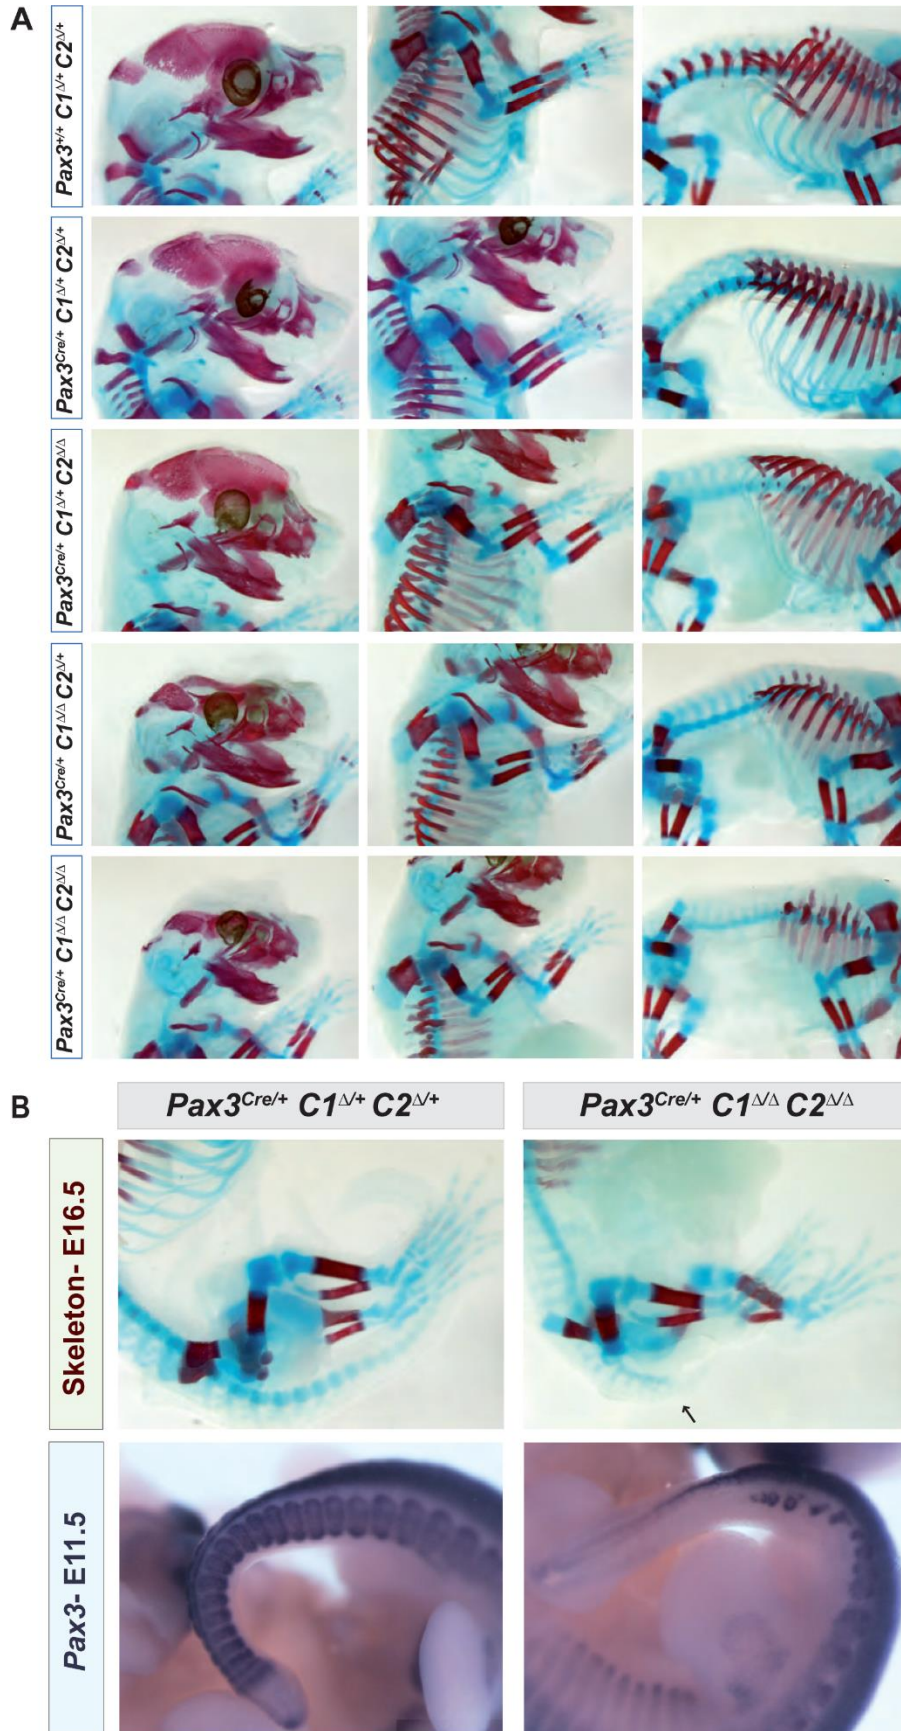

**Figure S1. Skeletal defects and tail truncations in *Foxc1/c2* conditional mutant embryos**

**(A)** Skeletal preparations of control  $Pax3^{+/+};Foxc1^{flox/+};Foxc2^{flox/+}$  ( $Pax3^{+/+} C1^{\Delta/+} C2^{\Delta/+}$ ), double heterozygous  $Pax3^{Cre/+};Foxc1^{flox/+};Foxc2^{flox/+}$  ( $Pax3^{Cre/+} C1^{\Delta/+} C2^{\Delta/+}$ ), *Foxc2* mutant  $Pax3^{Cre/+};Foxc1^{flox/+};Foxc2^{flox/flox}$  ( $Pax3^{Cre/+} C1^{\Delta/+} C2^{\Delta/\Delta}$ ), *Foxc1* mutant  $Pax3^{Cre/+};Foxc1^{flox/flox};Foxc2^{flox/+}$  ( $Pax3^{Cre/+} C1^{\Delta/\Delta} C2^{\Delta/+}$ ), and double conditional mutant ( $Pax3^{Cre/+}; Foxc1^{flox/flox}; Foxc2^{flox/flox}$  ( $Pax3^{Cre/+} C1^{\Delta/\Delta} C2^{\Delta/\Delta}$ ) embryos, at E16.5, reveal major defects in the absence of *Foxc1* and/or *Foxc2* in the cranial skeleton (neural crest derived), ribs and vertebrae (somite derived). Alcian blue stains non-mineralized cartilage, while Alizarin red stains mineralized bone and cartilage. **(B)** Upper panels of skeletal preparations show the absence (arrow) of posterior vertebrae (after the hindlimb) in the tail of double conditional mutant embryos ( $Pax3^{Cre/+} C1^{\Delta/\Delta} C2^{\Delta/\Delta}$ ) compared to heterozygote controls ( $Pax3^{Cre/+} C1^{\Delta/+} C2^{\Delta/+}$ ), at E16.5. Lower panels show the tail region of E11.5 embryos after whole mount *Pax3* *in situ* hybridisation, demonstrating the lack of posterior somites, marked by *Pax3* expression in the heterozygote control.

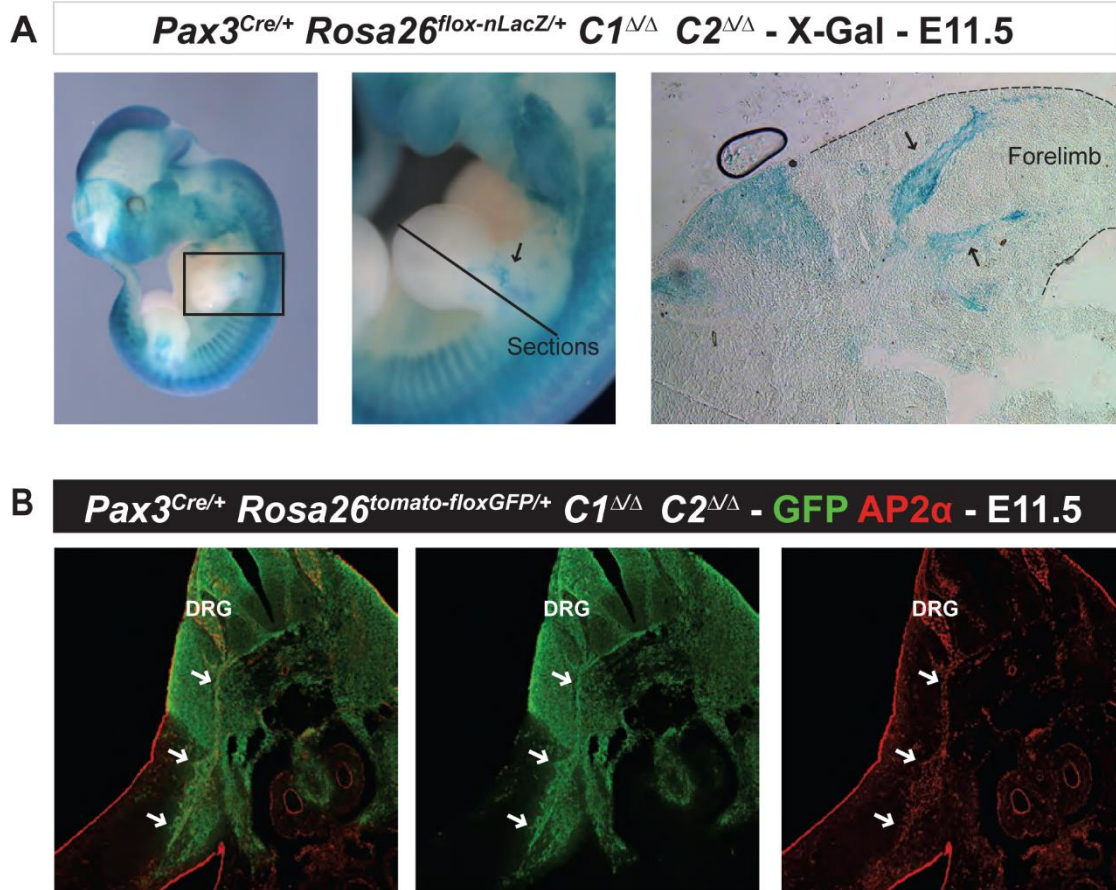

**Figure S2. Neural crest derivatives in the forelimb**

(A) X-Gal staining of a *Pax3<sup>Cre/+</sup>;Rosa26<sup>flox-nLacZ</sup>;Foxc1<sup>flox/flox</sup>;Foxc2<sup>flox/flox</sup>* (*Pax3<sup>Cre/+</sup> Rosa26<sup>flox-nLacZ/+</sup> C1<sup>Δ/Δ</sup> C2<sup>Δ/Δ</sup>*) embryo at E11.5 showing the labelled structure in the proximal forelimb derived from *Pax3* expressing progenitors indicated by arrows in the close up and the section. (B) Immunostaining, with antibodies to GFP and AP2 $\alpha$  that marks neural crest cells, of a section at forelimb level of a *Pax3<sup>Cre/+</sup>;Rosa26<sup>tomato-floxGFP/+</sup>;Foxc1<sup>flox/flox</sup>;Foxc2<sup>flox/flox</sup>* (*Pax3<sup>Cre/+</sup> Rosa26<sup>tomato-floxGFP/+</sup> C1<sup>Δ/Δ</sup> C2<sup>Δ/Δ</sup>*) embryo at E11.5 showing neural crest cells in the dorsal root ganglia (DRG) and extending into the forelimb (arrow). These cells contribute to the sympathetic nervous system in the limbs.

## SUPPLEMENTARY MATERIALS AND METHODS

**Table S1. Primary antibodies**

(IF, Immunofluorescence on section; Wh, Whole mount immunofluorescence; DSHB, *Developmental Studies Hybridoma Bank*)

| Antibodies                                                                           | Application | Source                                 | Dilution |
|--------------------------------------------------------------------------------------|-------------|----------------------------------------|----------|
| Monoclonal mouse Anti- <b>Pax3</b>                                                   | IF          | DSHB<br>(Pax3-c)                       | 1/250    |
| Monoclonal mouse Anti- <b>MF20</b>                                                   | IF          | DSHB<br>(MF-20-c)                      | 1/250    |
| Polyclonal rabbit Anti- <b>Myogenin (M-225)</b>                                      | IF          | Santa Cruz<br>(sc-576) #J2813          | 1/250    |
| Polyclonal rabbit Anti- <b>MyoD (C-20)</b>                                           | IF          | Santa Cruz<br>(sc-304) #D2709          | 1/250    |
| Monoclonal mouse Anti- <b>Myosin (Skeletal, Fast) Alkaline Phosphatase Conjugate</b> | Wh IF       | Sigma<br>(C6198) #051M4773             | 1/1000   |
| Monoclonal rat Anti- <b>CD31 (Pecam-1)</b>                                           | IF          | BD Pharmingen<br>(550274) #2243973     | 1/250    |
| Polyclonal rabbit Anti- <b>Myf5 (C-20)</b>                                           | IF          | SantaCruz<br>(sc-302) # H1407          | 1/250    |
| Monoclonal mouse Anti- <b>AP-2 alpha</b>                                             | IF          | DSHB<br>(5E4)                          | 1/250    |
| Polyclonal rabbit Anti- <b>Zo-1</b>                                                  | IF          | Invitrogen<br>(61-7300) #636050A       | 1/150    |
| Polyclonal rabbit Anti- <b>Lbx1</b>                                                  | IF          | Gift of<br>Dr. C.Birchmeier            | 1/5000   |
| Polyclonal chicken Anti- <b>GFP</b>                                                  | IF          | Life Technologies<br>(A10262) #1602788 | 1/500    |

*DSHB: Developmental Studies Hybridoma Bank*

All antibodies were used on control sections at the same time as the experiment on mutant sections, as shown in the figures.

**Table S2. RT-qPCR primer sequences**

| Gene Name    | Forward                | Reverse                |
|--------------|------------------------|------------------------|
| <i>Foxc1</i> | AGAGCCAAATGGAATGGAAC   | ATTCTGTTCGCTGGTGTGAG   |
| <i>Foxc2</i> | GCAACCCAACAGCAAACCTTC  | GACGGCGTAGCTCGATAGG    |
| <i>Gapdh</i> | GGCAAAGTGGAGATTGTTGC   | AATTTGCCGTGAGTGGAGTC   |
| <i>Lbx1</i>  | CTCGCCAGCAAGACCTTTA    | AAAGCGTTTCTCCAACCTCGT  |
| <i>Flk1</i>  | GTCGACATAGCCTCCACTGTTT | GTGATGTACACGATGCCATGCT |
